# Supplementary material for: Nicotianamine forms complexes with Zn(ii)in vivo
Source: Royal Society of Chemistry journal article supplement (doi:10.1039/b913299f), 2009-10-16

## Supplementary file S1: EXAFS refinements of all model compounds

Zn-K-edge EXAFS of Zn(II)-glutathione pH7

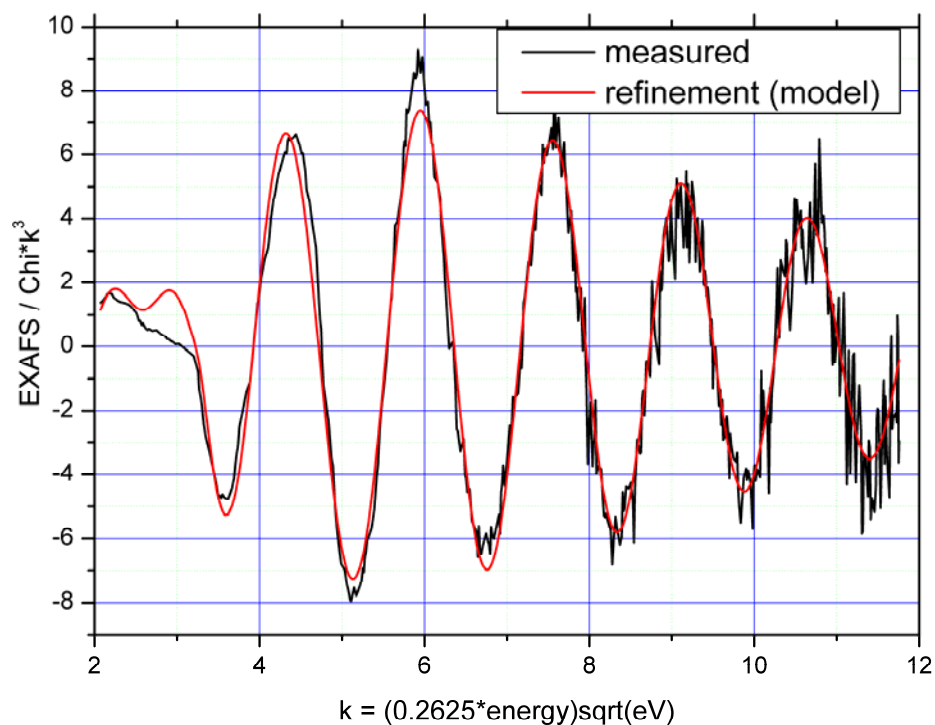

Zn-K-edge EXAFS of Zn(II)-glutathione pH7

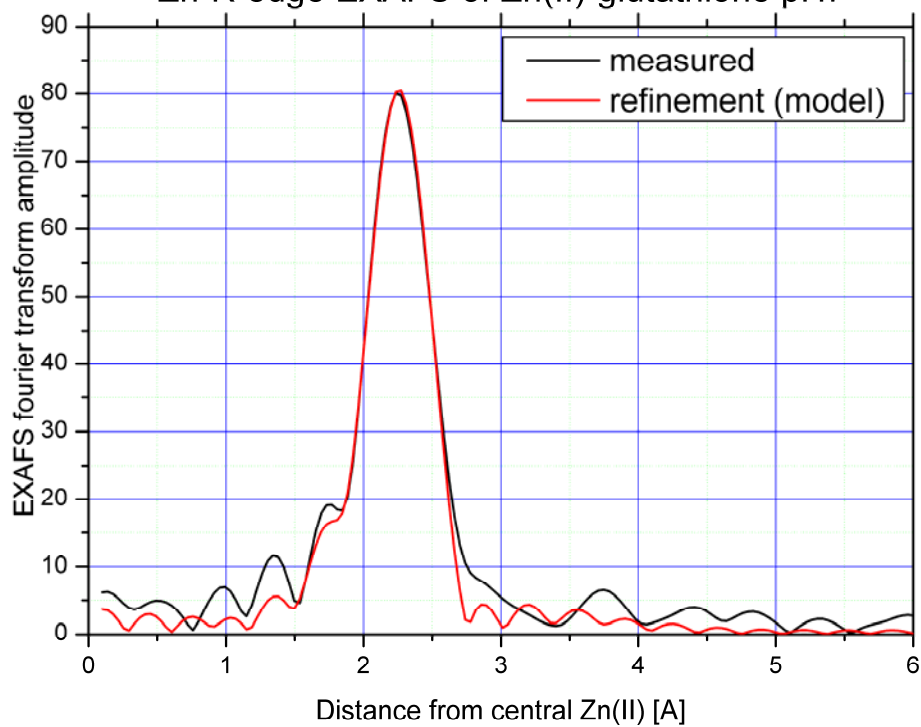

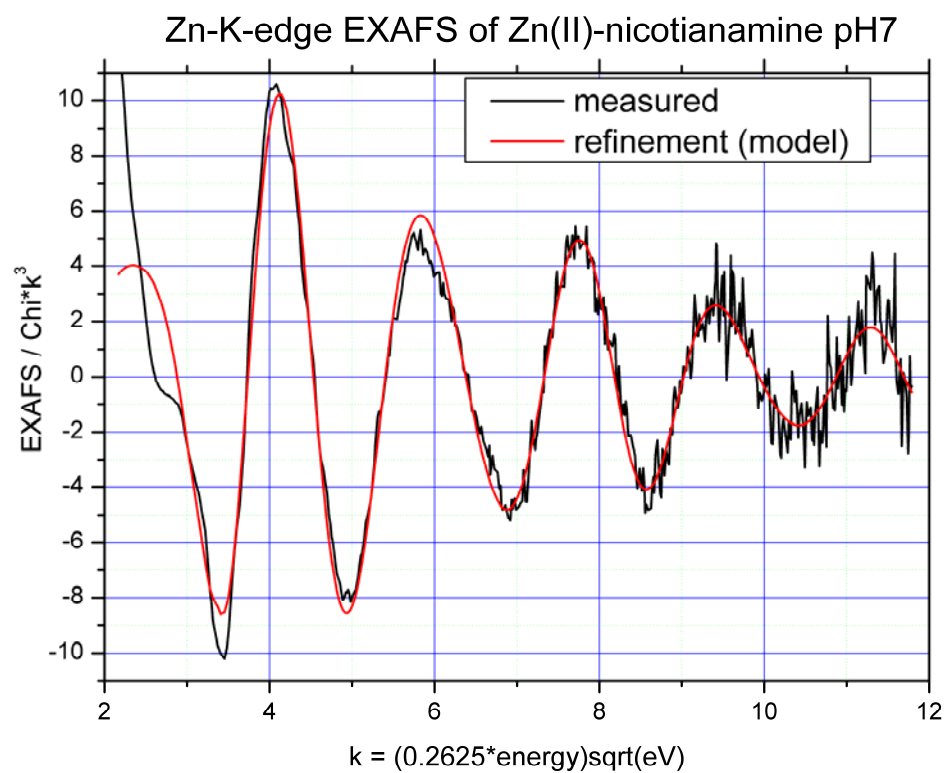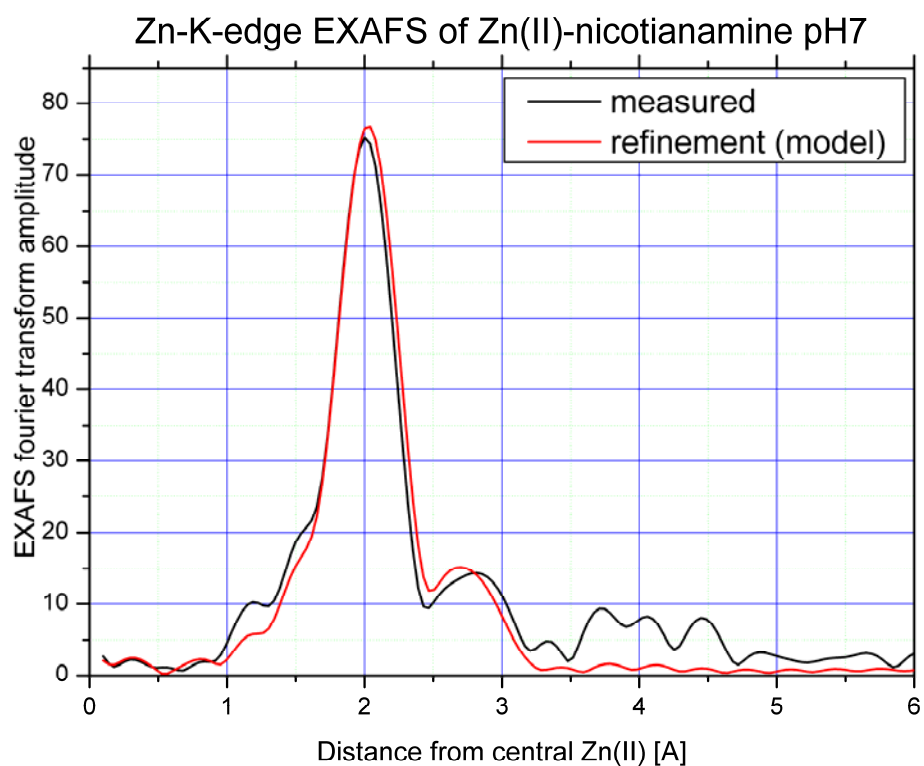

Supplement: b913299f-1.pdf [file b913299f-1.pdf]
