# Supplementary figures and images for: Nicotianamine forms complexes with Zn(ii)in vivo
Source: Royal Society of Chemistry journal article supplement (doi:10.1039/b913299f), 2009-10-16

## Supplementary file S2: EXAFS refinements of all *S. pombe* samples

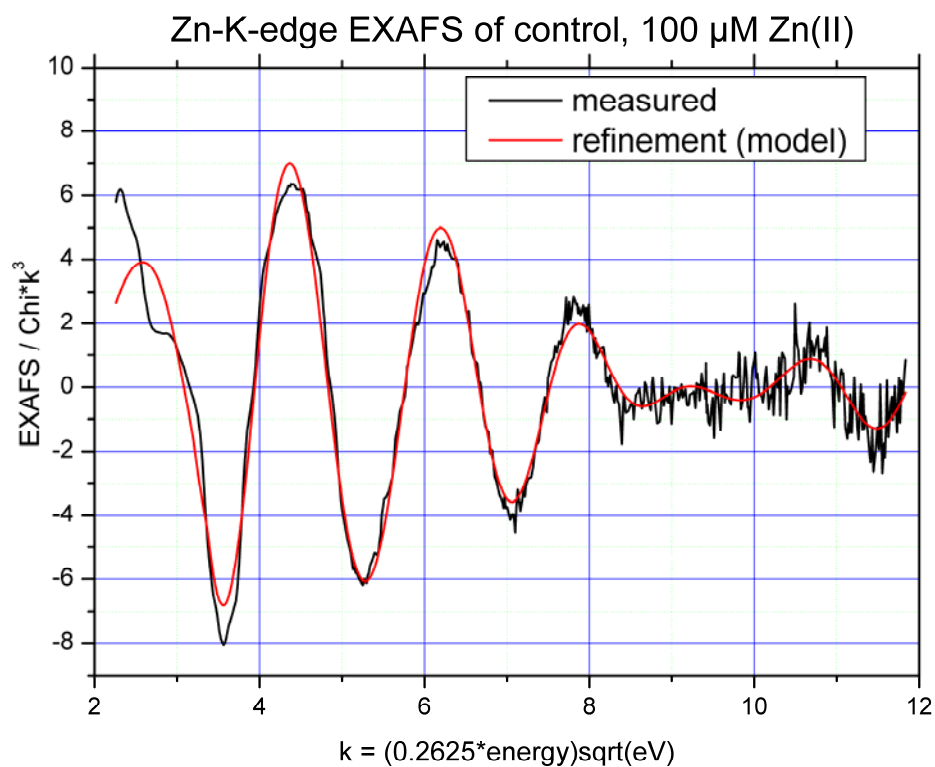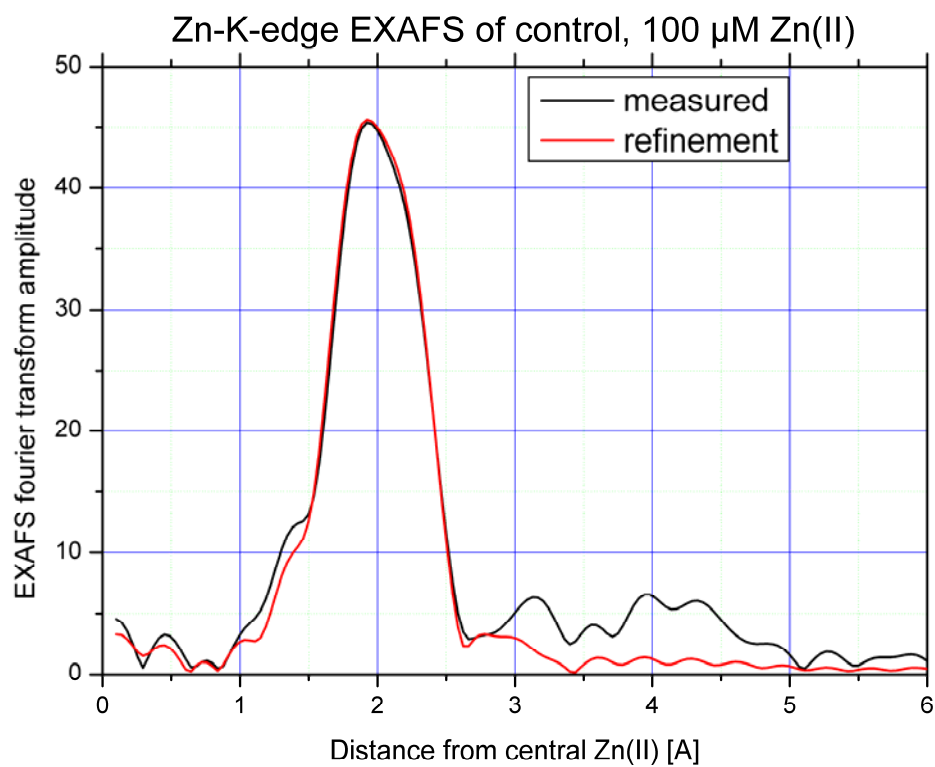

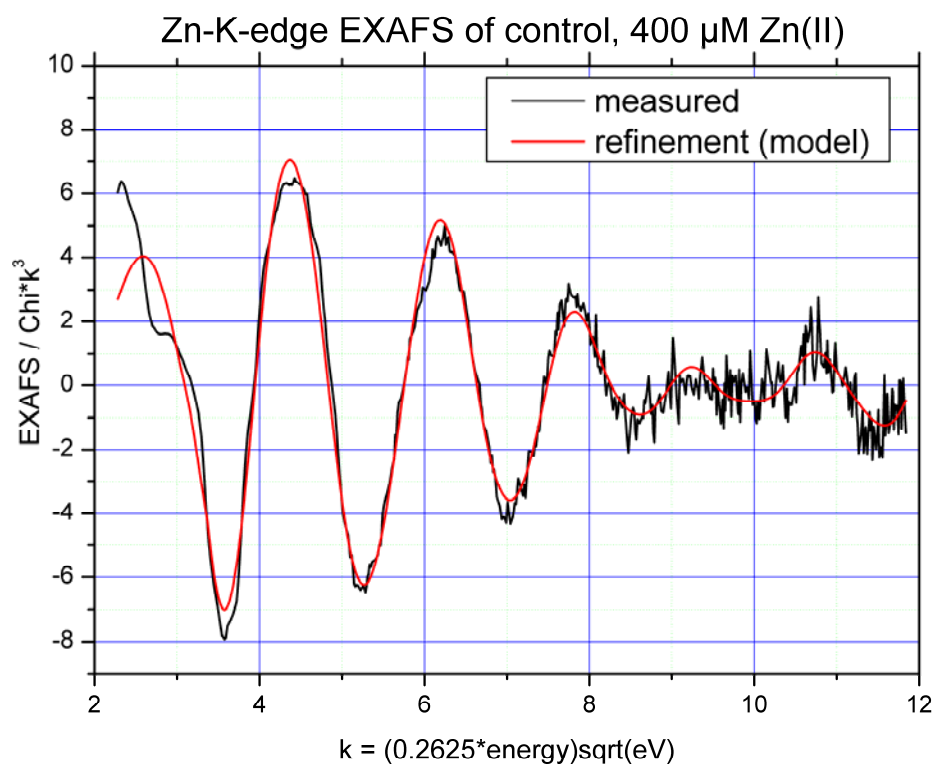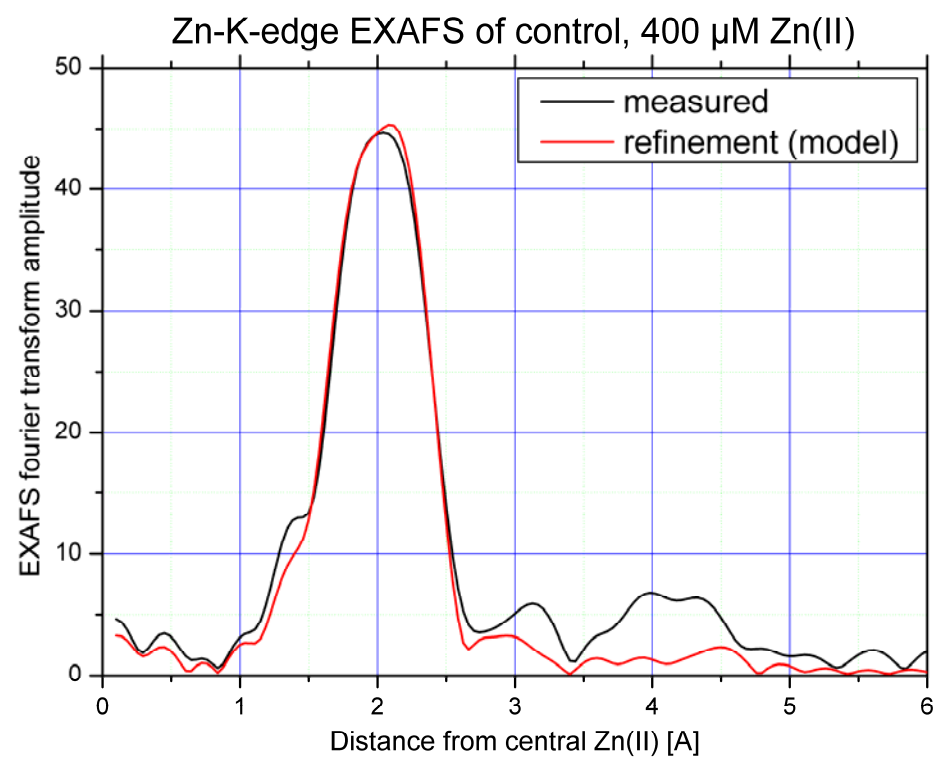

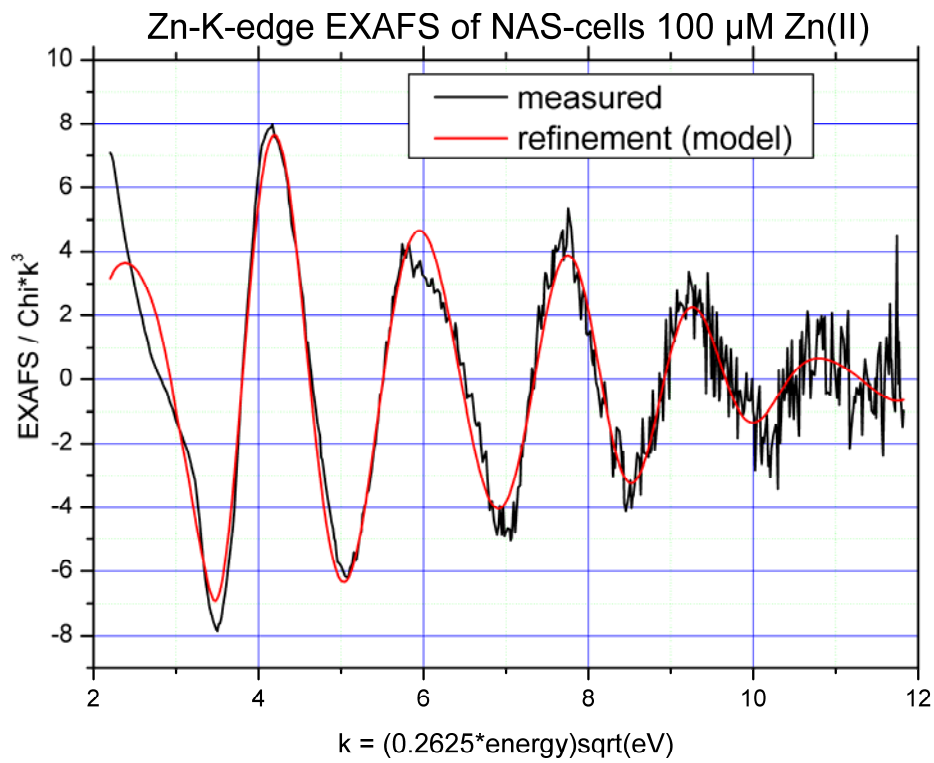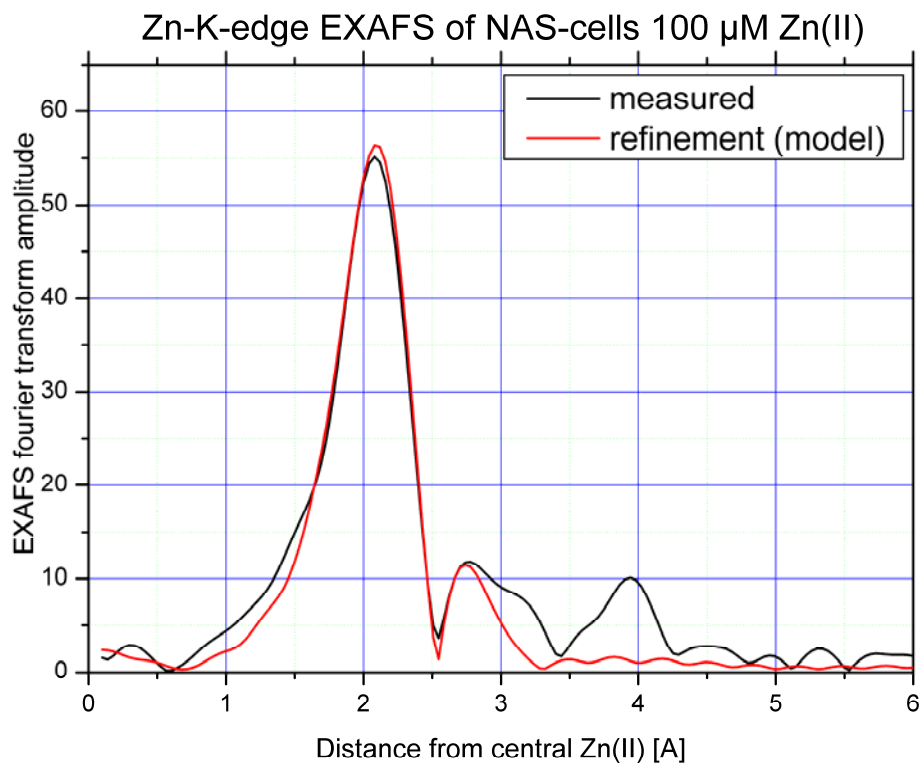

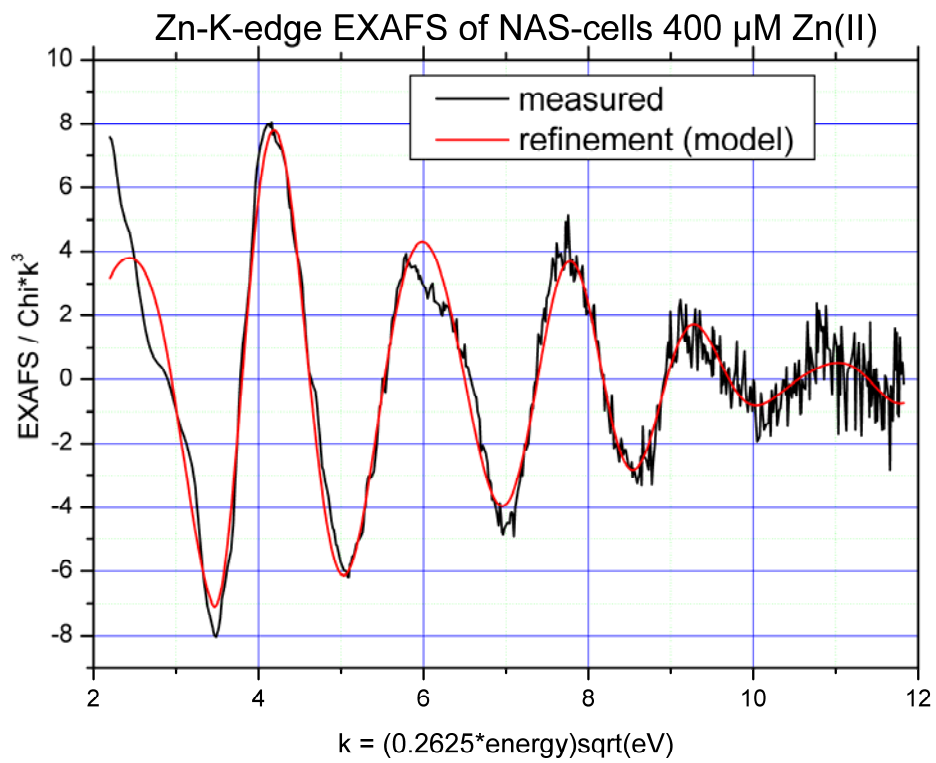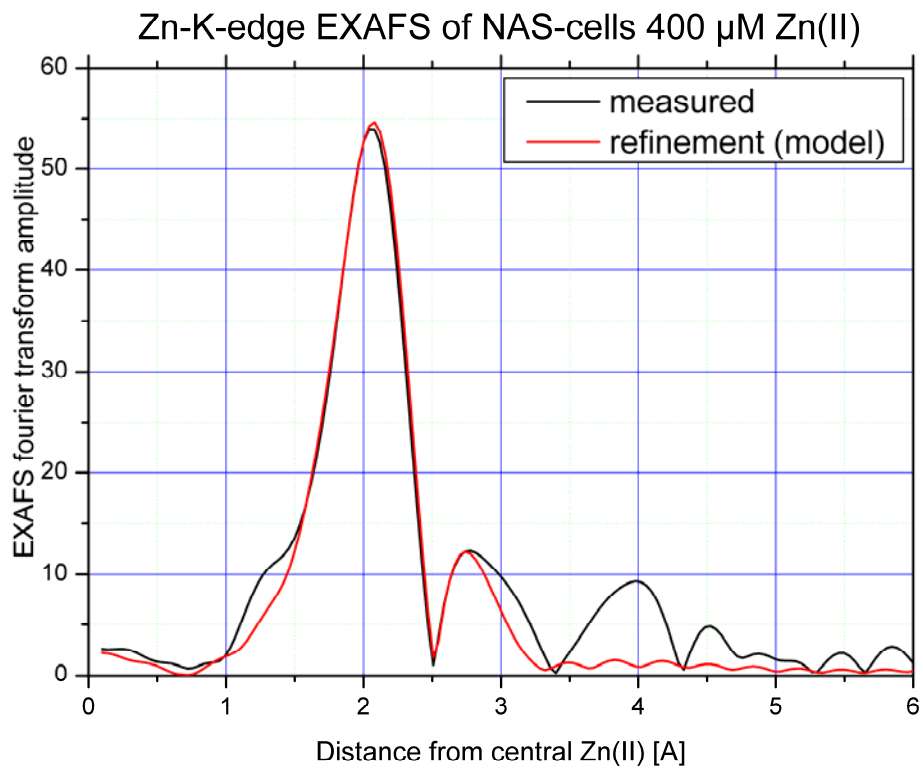

Supplement: b913299f-2.pdf [file b913299f-2.pdf]
